# Supplementary material
Source: publisher site journal article supplement (https://www.kjim.org/upload/media/kjim-2022-249_suppl1.pdf)
Supplement: Supplementary file 1 [file kjim-2022-249_suppl1.pdf]

**Supplementary Table 1. Baseline cardiovascular risk among hypertensive patients**

| Variable                                  | No. (%)      |
|-------------------------------------------|--------------|
| High-risk                                 | 3,839 (34.8) |
| History of cardiovascular disease         | 1,894 (17.2) |
| Chronic kidney disease                    | 1,550 (14.0) |
| Diabetes mellitus                         | 1,295 (11.7) |
| Moderate risk                             | 1,823 (16.5) |
| Left ventricular hypertrophy              | 1,551 (14.0) |
| Vascular stiffness on pulse wave velocity | 582 (5.3)    |
| Metabolic syndrome <sup>a</sup>           | 1,987 (18.0) |
| Low-risk                                  | 5,381 (48.7) |

<sup>a</sup>If patients with metabolic syndrome have additional risk factors of high-risk group, they were allocated in high-risk group. That is why the number of metabolic syndromes is more than that of moderate risk group.
